## Correction

# Correction: Tmprss2 Is Essential for Influenza H1N1 Virus Pathogenesis in Mice

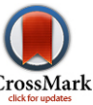**The PLOS Pathogens Staff**

The name of the second to last author in the authorship listing is spelled incorrectly. The correct spelling of the name is: Stefan Pöhlmann. The citation from the original article remains the same.

**Reference**

1. Hatesuer B, Bertram S, Mehnert N, Bahgat MM, Nelson PS, et al. (2013) Tmprss2 Is Essential for Influenza H1N1 Virus Pathogenesis in Mice. PLoS Pathog 9(12): e1003774. doi:10.1371/journal.ppat.1003774

---

**Citation:** The PLOS Pathogens Staff (2014) Correction: Tmprss2 Is Essential for Influenza H1N1 Virus Pathogenesis in Mice. PLoS Pathog 10(9): e1004435. doi:10.1371/journal.ppat.1004435

**Published** September 10, 2014

**Copyright:** © 2014 The PLOS Pathogens Staff. This is an open-access article distributed under the terms of the Creative Commons Attribution License, which permits unrestricted use, distribution, and reproduction in any medium, provided the original author and source are credited.
